# Supplementary material
Source: Springer Nature journal article supplement (https://www.springermedizin.de/resource/supplementary/12889_2009_1867_MOESM2_ESM.pdf/9504240)

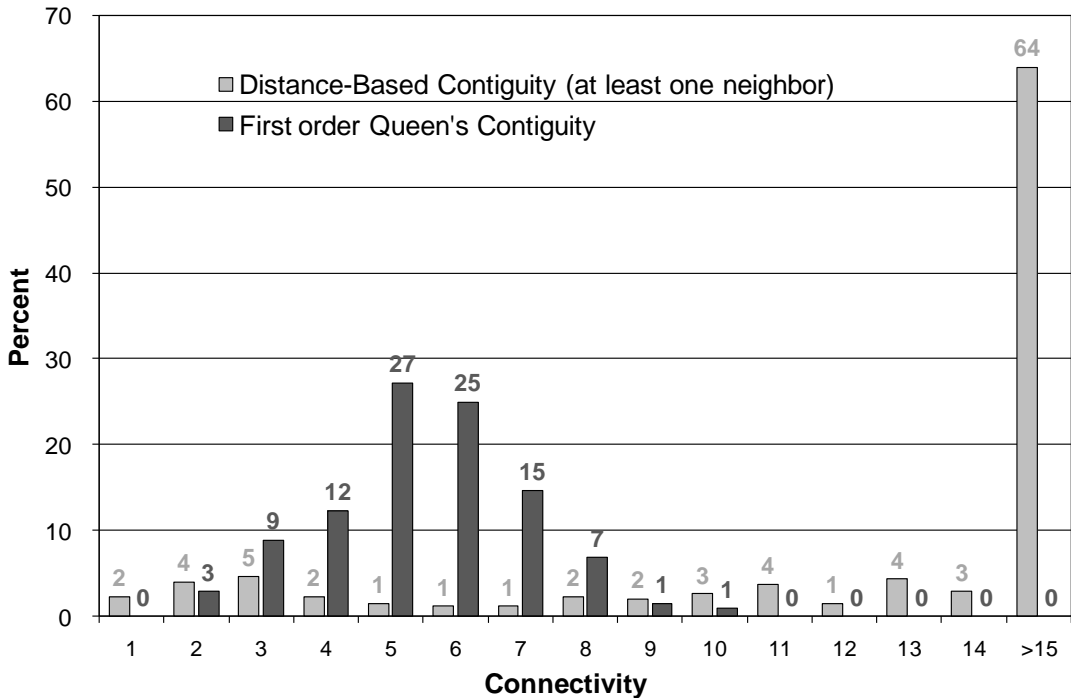

Supplement: MOESM2 [file 9504240]
